# Supplementary material for: Nitrocellulose membranes in situ grown with Prussian blue nanoparticles as stable nanozyme pads for colorimetric detection of dopamine
Source: Royal Society of Chemistry journal article supplement (doi:10.1039/d3ay01125a), 2023-01-01
Supplement: d3ay01125a1.pdf [file d3ay01125a1.pdf]

# Analytical Methods

## Electronic Supplementary Information (ESI)

### **Nitrocellulose membranes in-situ grown with Prussian blue nanoparticles as stable nanozyme pads for colorimetric detection of dopamine**

Shuting Zhang<sup>a,†</sup>, Cuili Li<sup>a,†</sup>, Zhihong Sun<sup>b</sup>, Jie Liu<sup>b,\*</sup>, and Guanglei Fu<sup>a,\*</sup>

<sup>a</sup>School of Pharmacy, Key Laboratory of Molecular Pharmacology and Drug Evaluation, Ministry of Education, Collaborative Innovation Center of Advanced Drug Delivery System and Biotech Drugs in Universities of Shandong, Yantai University, Yantai, Shandong 264005, China.

<sup>b</sup>Department of Clinical Laboratory, Affiliated Yantai Yuhuangding Hospital of Qingdao University, Yantai, Shandong 264000, China.

\*Corresponding authors.

E-mail: liulocus@126.com (J. Liu), fuguanglei@ytu.edu.cn (G. Fu)

<sup>†</sup>Shuting Zhang and Cuili Li contributed equally to the article.

# Table of Contents

|                                      |           |
|--------------------------------------|-----------|
| <b>1. Supplementary Results.....</b> | <b>S3</b> |
| Fig. S1.....                         | S3        |
| Fig. S2.....                         | S3        |
| Fig. S3.....                         | S3        |
| Table S1.....                        | S4        |

## 1. Supplementary Results

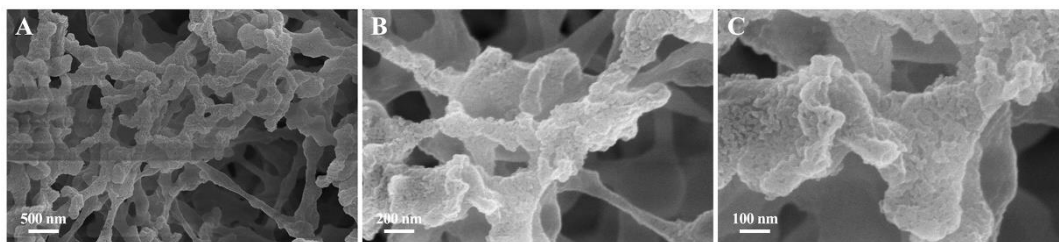

**Fig. S1** (A-C) SEM images of the nanozyme pad at different magnifications ( $\text{FeCl}_3$  concentration: 3.0 mM).

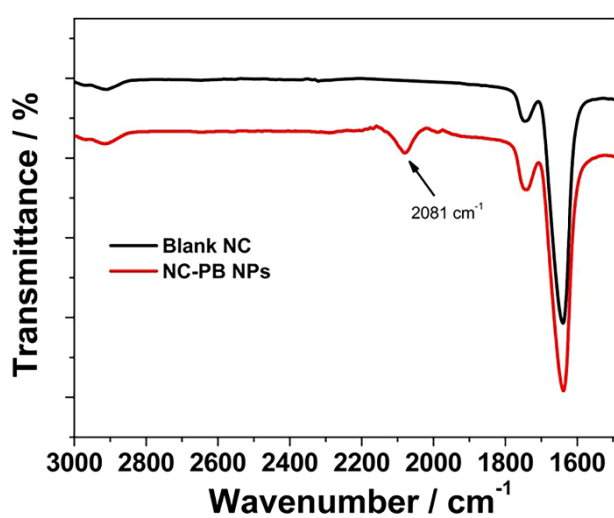

**Fig. S2** FT-IR spectra of blank NC membranes and the nanozyme pads (NC-PB NPs) ( $\text{FeCl}_3$  concentration: 1.0 mM).

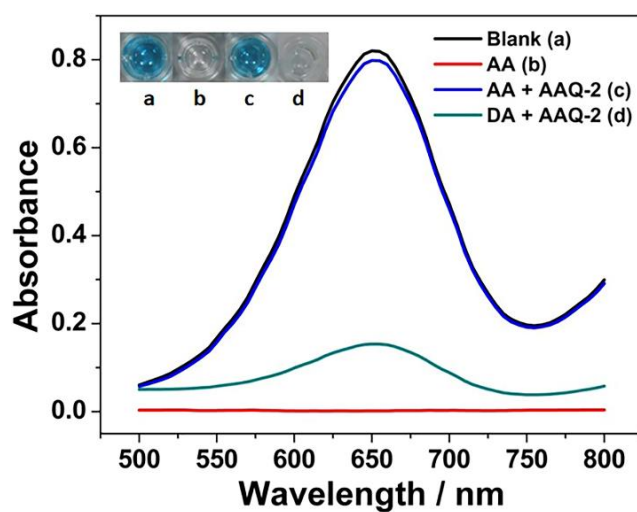

**Fig. S3** UV-vis spectra of the colorimetric reaction solutions in the presence of different components (AA: 300  $\mu\text{M}$ , AAQ-2: 1.5 mM, DA: 30  $\mu\text{M}$ ). Inset: Photographs of relevant reaction

solutions.

**Table S1** Determination results of DA in real human urine samples (n = 3)

| Sample | Spiked concentration ( $\mu\text{M}$ ) | Detected concentration ( $\mu\text{M}$ ) | Recovery (%) | Relative standard deviation (RSD) (%) |
|--------|----------------------------------------|------------------------------------------|--------------|---------------------------------------|
| 1      | 5.00                                   | 4.93                                     | 98.50        | 4.82                                  |
| 2      | 10.00                                  | 9.60                                     | 96.00        | 1.57                                  |
| 3      | 20.00                                  | 20.00                                    | 100.00       | 3.23                                  |
